# Supplementary material for: SARS-CoV-2 quasi-species analysis from patients with persistent nasopharyngeal shedding
Source: PubMed Central journal article supplement (PMC9636146; doi:10.1038/s41598-022-22060-z), 2022-11-04

# Correlation between variability per position and Ct

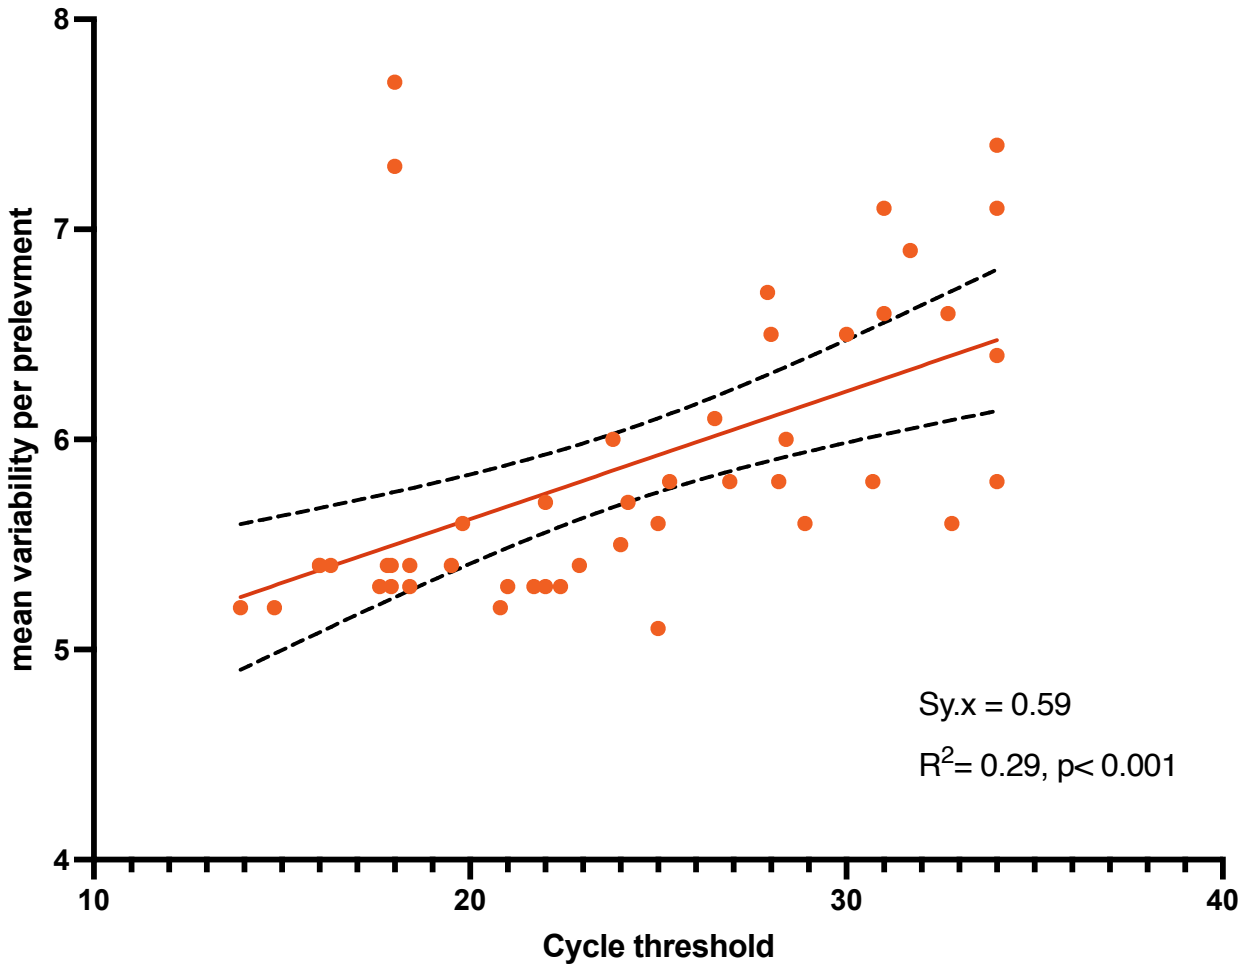

Supplement: 41598_2022_22060_MOESM4_ESM.pdf [file 41598_2022_22060_MOESM4_ESM.pdf]
